# Supplementary material for: A Network Pharmacology Approach to Uncover the Multiple Mechanisms of Hedyotis diffusa Willd. on Colorectal Cancer
Source: Evid Based Complement Alternat Med. 2018 Feb 12;2018:6517034. doi: 10.1155/2018/6517034 (PMC5829364; doi:10.1155/2018/6517034)
Supplement: Supplementary Materials — Table S1: the compounds information of HDW. Table S2: the compounds in HDW and their corresponding targets. Table S3: the targets of CRC. Table S4: the topological features of all nodes in the CRC targets' PPI network. Table S5: the topological features of all nodes in the compound-compound target-CRC target-other human proteins' PPI network. Table S6: the GO analysis for the major targets of HDW (FDR < 0.01). Table S7: the KEGG analysis for the major targets of HDW (FDR < 0.01). [file 6517034.f1.zip › Table S1.xlsx]

## Sheet: Sheet1
Table S1 Chemical compounds in HDW
Compound
10-O-benzoyl-6'-O-α-L-arabino(1→6)-β-D-glucopyranosylgeniposidic acid
2,3-dimethoxy-6-methyl-anthraquinone
2-hydroxy-3-methylanthraquinone
2-methoxy-3-methyl-9,10-anthraquinone
2-methyl-3-hydroxy-4-methoxy-anthraquinone
3-epioleanolic acid
3-hydroxy-2-methyl-anthraquinone
3'-hydroxyanethole
4-epiborreriagenin
4-methoxycinnamic acid
5-O-p-methoxy cinnamoyl scandoside methylester
asperuloside
asuperlosidic acid
coumaric acid
coumarin
daphylloside
darutoside
deacetyl-6-ethoxyasperulosidic acid methyl ester
deacetylasperuloside
deacetylasperulosidic acid methyl ester
deacetylasperulosidic acid
diffusoside A
diffusoside B
digitolutein
E-6-O-coumaroyl scandoside methyl ester
E-6-O-feruloyl scandoside methyl ester
E-6-O-p-coumaroyl scandoside methyl ester
E-6-O-p-feruloyl scandoside methyl ester
E-6-O-p-methoxycinnamoyl scandoside methyl ester
ferulic acid
gardenoside
genipin
geniposide
geniposidic acid
isoquercitrin
kaempferol 3-O-[2-O-(6-O-E-feruloyl)-β-D-glucopyranosyl]-β-D-galactopyranoside
kaempferol 3-O-[2''-O-(E-6'''-O-feruloyl)-β-D-glucopyranosyl]-β-D-galactopyranoside
methyl 6-O-methyldeacetylasperulosidate
methyl deacetylasperulosidate
oleanolic acid-28-O-β-D-glucopyranoside
oleanolic acid-3-O-β-D-glucuronopyranoside
oleanolic acid
panasenoside
p-coumaric acid
poriferasterol
quercetin
quercetin 3-O-[2-O-(6-O-E-feruloyl)-β-D-glucopyranosyl]-β-D-galactopyranoside
quercetin 3-O-[2-O-(6-O-E-feruloyl)-β-D-glucopyranosyl]-β-D-glucopyranoside
quercetin-3-O-(2''-O-β-D-glucopyranosyl)-β-D-galactopyranoside
quercetin-3-O-[(6-O-feruloyl)-β-D-glucopyra-nosyl-(1→2)-β-D-galactopyranoside]
quercetin-3-O-[2-O-(6-O-E-sinapoyl)-β-D-glu-copyranosyl]-β-D-glucopyranoside
quercetin-3-O-sambubioside
quercetin-3-sophoroside
rutin
scandoside methyl ester
scandoside
scopoletol
sitogluside
stigmasterol-5,22-diene-3β,7α-glycol
stigmasterol-5,22-diene-3β,7β-glycol
stigmasterol-β-D-glucoside
stigmasterol
succinic acid
trans-4-methoxycinnamyl alcohol
ursolic acid
Z-6-O-feruloyl scandoside methyl ester
Z-6-O-p-coumaroyl scandoside methyl ester
Z-6-O-p-methoxycinnamoyl scandoside methyl ester
β-sitosterol
