# Supplementary material for: A Network Pharmacology Approach to Uncover the Multiple Mechanisms of Hedyotis diffusa Willd. on Colorectal Cancer
Source: Evid Based Complement Alternat Med. 2018 Feb 12;2018:6517034. doi: 10.1155/2018/6517034 (PMC5829364; doi:10.1155/2018/6517034)
Supplement: Supplementary Materials — Table S1: the compounds information of HDW. Table S2: the compounds in HDW and their corresponding targets. Table S3: the targets of CRC. Table S4: the topological features of all nodes in the CRC targets' PPI network. Table S5: the topological features of all nodes in the compound-compound target-CRC target-other human proteins' PPI network. Table S6: the GO analysis for the major targets of HDW (FDR < 0.01). Table S7: the KEGG analysis for the major targets of HDW (FDR < 0.01). [file 6517034.f1.zip › Table S2.xlsx]

## Sheet: Sheet1
Table S2 Compounds in HDW and their corresponding targets
Compound	Gene name	Protein name
2-hydroxy-3-methylanthraquinone	CASP3	Caspase-3
	KIT	Mast/stem cell growth factor receptor Kit
	MAPK14	Mitogen-activated protein kinase 14
	ELANE	Neutrophil elastase
	MMP3	Stromelysin-1
	AR	Androgen receptor
	ALB	Serum albumin
	MAP2K1	Dual specificity mitogen-activated protein kinase kinase 1
	PDE4D	cAMP-specific 3',5'-cyclic phosphodiesterase 4D
	VDR	Vitamin D3 receptor
	NR1H4	Bile acid receptor
	AKR1B1	Aldose reductase
	BACE1	Beta-secretase 1
	KDR	Vascular endothelial growth factor receptor 2
	LCK	Tyrosine-protein kinase Lck
	MME	Neprilysin
	MET	Hepatocyte growth factor receptor
	BRAF	Serine/threonine-protein kinase B-raf
	METAP2	Methionine aminopeptidase 2
	CHEK1	Serine/threonine-protein kinase Chk1
	THRB	Thyroid hormone receptor beta
	PTPN1	Tyrosine-protein phosphatase non-receptor type 1
	FKBP1A	Peptidyl-prolyl cis-trans isomerase FKBP1A
	HSD17B1	Estradiol 17-beta-dehydrogenase 1
	SYK	Tyrosine-protein kinase SYK
	CDK2	Cyclin-dependent kinase 2
	DHODH	Dihydroorotate dehydrogenase (quinone), mitochondrial
	CTSK	Cathepsin K
	HSD11B1	Corticosteroid 11-beta-dehydrogenase isozyme 1
2-methoxy-3-methyl-9,10-anthraquinone	ALB	Serum albumin
	AR	Androgen receptor
	MAP2K1	Dual specificity mitogen-activated protein kinase kinase 1
	MME	Neprilysin
	BRAF	Serine/threonine-protein kinase B-raf
	KDR	Vascular endothelial growth factor receptor 2
	AKR1B1	Aldose reductase
	PDE4D	cAMP-specific 3',5'-cyclic phosphodiesterase 4D
	LCK	Tyrosine-protein kinase Lck
	MAPK14	Mitogen-activated protein kinase 14
	CHEK1	Serine/threonine-protein kinase Chk1
	PTPN1	Tyrosine-protein phosphatase non-receptor type 1
	THRB	Thyroid hormone receptor beta
	FKBP1A	Peptidyl-prolyl cis-trans isomerase FKBP1A
	CDK2	Cyclin-dependent kinase 2
	MAPK10	Mitogen-activated protein kinase 10
	CTSK	Cathepsin K
	MMP3	Stromelysin-1
	ABO	Histo-blood group ABO system transferase
	HSD11B1	Corticosteroid 11-beta-dehydrogenase isozyme 1
	HMGCR	3-hydroxy-3-methylglutaryl-coenzyme A reductase
	F2	Prothrombin
	DHODH	Dihydroorotate dehydrogenase (quinone), mitochondrial
	NR1H2	Oxysterols receptor LXR-beta
	BTK	Tyrosine-protein kinase BTK
	SRC	Proto-oncogene tyrosine-protein kinase Src
	KDR	Vascular endothelial growth factor receptor 2
	TTR	Transthyretin
	BACE1	Beta-secretase 1
3-epioleanolic acid	TTR	Transthyretin
	MAP2K1	Dual specificity mitogen-activated protein kinase kinase 1
	HSD11B1	Corticosteroid 11-beta-dehydrogenase isozyme 1
	RBP4	Retinol-binding protein 4
	CRABP2	Cellular retinoic acid-binding protein 2
	HSD17B1	Estradiol 17-beta-dehydrogenase 1
	TRAPPC3	Trafficking protein particle complex subunit 3
	GSTP1	Glutathione S-transferase P
	PCTP	Phosphatidylcholine transfer protein
	VDR	Vitamin D3 receptor
	TTPA	Alpha-tocopherol transfer protein
	MAOB	Amine oxidase [flavin-containing] B
	RORA	Nuclear receptor ROR-alpha
	FABP3	Fatty acid-binding protein, heart
	NR3C1	Glucocorticoid receptor
	NR1I2	Nuclear receptor subfamily 1 group I member 2
	PGR	Progesterone receptor
	PPP1CC	Serine/threonine-protein phosphatase PP1-gamma catalytic subunit
	LSS	Lanosterol synthase
	AR	Androgen receptor
	ADH5	Alcohol dehydrogenase class-3
	THRA	Thyroid hormone receptor alpha
	FABP7	Fatty acid-binding protein, brain
	RXRA	Retinoic acid receptor RXR-alpha
	PROCR	Endothelial protein C receptor
	GRB2	Growth factor receptor-bound protein 2
	NR1H2	Oxysterols receptor LXR-beta
	RARG	Retinoic acid receptor gamma
	ALB	Serum albumin
3'-hydroxyanethole	AKR1B1	Aldose reductase
	PDPK1	3-phosphoinositide-dependent protein kinase 1
	PNMT	Phenylethanolamine N-methyltransferase
	FGFR1	Fibroblast growth factor receptor 1
	AR	Androgen receptor
	THRB	Thyroid hormone receptor beta
	NR3C1	Glucocorticoid receptor
	RARG	Retinoic acid receptor gamma
	F2	Prothrombin
	CDK2	Cyclin-dependent kinase 2
	METAP2	Methionine aminopeptidase 2
	PTPN1	Tyrosine-protein phosphatase non-receptor type 1
	CA2	Carbonic anhydrase 2
	INSR	Insulin receptor
	BACE1	Beta-secretase 1
	MAPK14	Mitogen-activated protein kinase 14
	PPIA	Peptidyl-prolyl cis-trans isomerase A
	TEK	Angiopoietin-1 receptor
	DUT	Deoxyuridine 5'-triphosphate nucleotidohydrolase, mitochondrial
	EIF4E	Eukaryotic translation initiation factor 4E
	GSTP1	Glutathione S-transferase P
	PDE4B	cAMP-specific 3',5'-cyclic phosphodiesterase 4B
	FKBP1A	Peptidyl-prolyl cis-trans isomerase FKBP1A
	PPARG	Peroxisome proliferator-activated receptor gamma
	DPP4	Dipeptidyl peptidase 4
	HCK	Tyrosine-protein kinase HCK
	AGXT	Serine--pyruvate aminotransferase
	PDE4D	cAMP-specific 3',5'-cyclic phosphodiesterase 4D
	DTYMK	Thymidylate kinase
4-methoxycinnamic acid	CHEK1	Serine/threonine-protein kinase Chk1
	PIM1	Serine/threonine-protein kinase pim-1
	KDR	Vascular endothelial growth factor receptor 2
	CA1	Carbonic anhydrase 1
	CA2	Carbonic anhydrase 2
	CDK2	Cyclin-dependent kinase 2
	PRKACA	cAMP-dependent protein kinase catalytic subunit alpha
	YARS	Tyrosine--tRNA ligase, cytoplasmic
	CDK6	Cyclin-dependent kinase 6
	ADH5	Alcohol dehydrogenase class-3
	PDE4D	cAMP-specific 3',5'-cyclic phosphodiesterase 4D
	PTPN1	Tyrosine-protein phosphatase non-receptor type 1
	PDPK1	3-phosphoinositide-dependent protein kinase 1
	PAH	Phenylalanine-4-hydroxylase
	PDE4B	cAMP-specific 3',5'-cyclic phosphodiesterase 4B
	HSP90AA1	Heat shock protein HSP 90-alpha
	LCK	Tyrosine-protein kinase Lck
	SRC	Proto-oncogene tyrosine-protein kinase Src
	MMP13	Collagenase 3
	GSK3B	Glycogen synthase kinase-3 beta
	THRA	Thyroid hormone receptor alpha
	CHEK1	Serine/threonine-protein kinase Chk1
	IMPDH1	Inosine-5'-monophosphate dehydrogenase 1
	SULT2B1	Sulfotransferase family cytosolic 2B member 1
	HCK	Tyrosine-protein kinase HCK
	DTYMK	Thymidylate kinase
	SETD7	Histone-lysine N-methyltransferase SETD7
	AGXT	Serine--pyruvate aminotransferase
	CCNA2	Cyclin-A2
asperuloside	PDE4B	cAMP-specific 3',5'-cyclic phosphodiesterase 4B
	BCHE	Cholinesterase
	MTAP	S-methyl-5'-thioadenosine phosphorylase
	NUDT9	ADP-ribose pyrophosphatase, mitochondrial
	TGFBR2	TGF-beta receptor type-2
	CHEK1	Serine/threonine-protein kinase Chk1
	FKBP1A	Peptidyl-prolyl cis-trans isomerase FKBP1A
	CDK2	Cyclin-dependent kinase 2
	CA2	Carbonic anhydrase 2
	F2	Prothrombin
	DDX6	Probable ATP-dependent RNA helicase DDX6
	AURKA	Aurora kinase A
	IMPA1	Inositol monophosphatase 1
	ESR1	Estrogen receptor
	GSTP1	Glutathione S-transferase P
	PGR	Progesterone receptor
	GBA	Glucosylceramidase
	CA12	Carbonic anhydrase 12
	GSR	Glutathione reductase, mitochondrial
	AMY1A	Alpha-amylase 1
	AMY1B
	AMY1C
	CTSB	Cathepsin B
	HSPA8	Heat shock cognate 71 kDa protein
	HSD11B1	Corticosteroid 11-beta-dehydrogenase isozyme 1
	PDE4D	cAMP-specific 3',5'-cyclic phosphodiesterase 4D
	CA1	Carbonic anhydrase 1
	ANG	Angiogenin
	AKR1B1	Aldose reductase
	PYGL	Glycogen phosphorylase, liver form
	DHFR	Dihydrofolate reductase
asuperlosidic acid	NUDT9	ADP-ribose pyrophosphatase, mitochondrial
	TGFBR2	TGF-beta receptor type-2
	CDK2	Cyclin-dependent kinase 2
	CA2	Carbonic anhydrase 2
	IMPA1	Inositol monophosphatase 1
	SNRPA	U1 small nuclear ribonucleoprotein A
	AURKA	Aurora kinase A
	BCHE	Cholinesterase
	GBA	Glucosylceramidase
	FAP	Prolyl endopeptidase FAP
	CTSS	Cathepsin S
	PLA2G10	Group 10 secretory phospholipase A2
	PDPK1	3-phosphoinositide-dependent protein kinase 1
	EGFR	Epidermal growth factor receptor
	DDX6	Probable ATP-dependent RNA helicase DDX6
	PDE4B	cAMP-specific 3',5'-cyclic phosphodiesterase 4B
	GSTP1	Glutathione S-transferase P
	NPR3	Atrial natriuretic peptide receptor 3
	NOS3	Nitric oxide synthase, endothelial
	CA12	Carbonic anhydrase 12
	CHEK1	Serine/threonine-protein kinase Chk1
	MAOB	Amine oxidase [flavin-containing] B
	FGFR1	Fibroblast growth factor receptor 1
	CCNA2	Cyclin-A2
	AKR1B1	Aldose reductase
	AKT1	RAC-alpha serine/threonine-protein kinase
	PIM1	Serine/threonine-protein kinase pim-1
	RIDA	2-iminobutanoate/2-iminopropanoate deaminase
	ALDH2	Aldehyde dehydrogenase, mitochondrial
coumarin	HRAS	GTPase HRas
	HMGCR	3-hydroxy-3-methylglutaryl-coenzyme A reductase
	GSTT2B	Glutathione S-transferase theta-2B
	MME	Neprilysin
	ELANE	Neutrophil elastase
	TGFB2	Transforming growth factor beta-2
	BACE1	Beta-secretase 1
	MMP3	Stromelysin-1
	DCK	Deoxycytidine kinase
	METAP2	Methionine aminopeptidase 2
	FABP6	Gastrotropin
	SHMT1	Serine hydroxymethyltransferase, cytosolic
	PRKACA	cAMP-dependent protein kinase catalytic subunit alpha
	GSTM1	Glutathione S-transferase Mu 1
	F2	Prothrombin
	CA2	Carbonic anhydrase 2
	PDE4D	cAMP-specific 3',5'-cyclic phosphodiesterase 4D
	GSTA3	Glutathione S-transferase A3
	NR3C1	Glucocorticoid receptor
	CTSK	Cathepsin K
	MET	Hepatocyte growth factor receptor
	GSTA1	Glutathione S-transferase A1
	PCK1	Phosphoenolpyruvate carboxykinase, cytosolic [GTP]
	UAP1	UDP-N-acetylhexosamine pyrophosphorylase
	NOS2	Nitric oxide synthase, inducible
	HPRT1	Hypoxanthine-guanine phosphoribosyltransferase
	AR	Androgen receptor
	KIF11	Kinesin-like protein KIF11
	PDE4B	cAMP-specific 3',5'-cyclic phosphodiesterase 4B
daphylloside	TREM1	Triggering receptor expressed on myeloid cells 1
	NUDT9	ADP-ribose pyrophosphatase, mitochondrial
	TGFBR2	TGF-beta receptor type-2
	BCHE	Cholinesterase
	AURKA	Aurora kinase A
	GBA	Glucosylceramidase
	FAP	Prolyl endopeptidase FAP
	PLA2G10	Group 10 secretory phospholipase A2
	PDPK1	3-phosphoinositide-dependent protein kinase 1
	CA12	Carbonic anhydrase 12
	EGFR	Epidermal growth factor receptor
	CA2	Carbonic anhydrase 2
	PDE4B	cAMP-specific 3',5'-cyclic phosphodiesterase 4B
	CDK2	Cyclin-dependent kinase 2
	CFD	Complement factor D
	MTAP	S-methyl-5'-thioadenosine phosphorylase
	PGR	Progesterone receptor
	CHEK1	Serine/threonine-protein kinase Chk1
	REN	Renin
	AR	Androgen receptor
	GSTP1	Glutathione S-transferase P
	IMPA1	Inositol monophosphatase 1
	AKR1B1	Aldose reductase
	PIM1	Serine/threonine-protein kinase pim-1
	DPP4	Dipeptidyl peptidase 4
	CCNA2	Cyclin-A2
	ALDH2	Aldehyde dehydrogenase, mitochondrial
	AMY1A	Alpha-amylase 1
	AMY1B
	AMY1C
	CBR1	Carbonyl reductase [NADPH] 1
deacetylasperuloside	PDE4B	cAMP-specific 3',5'-cyclic phosphodiesterase 4B
	CA2	Carbonic anhydrase 2
	PGR	Progesterone receptor
	NUDT9	ADP-ribose pyrophosphatase, mitochondrial
	METAP1	Methionine aminopeptidase 1
	CCNA2	Cyclin-A2
	TGFBR2	TGF-beta receptor type-2
	GBA	Glucosylceramidase
	BCHE	Cholinesterase
	F2	Prothrombin
	CA12	Carbonic anhydrase 12
	GSR	Glutathione reductase, mitochondrial
	MIF	Macrophage migration inhibitory factor
	PDE4D	cAMP-specific 3',5'-cyclic phosphodiesterase 4D
	CTSD	Cathepsin D
	PIM1	Serine/threonine-protein kinase pim-1
	ESR1	Estrogen receptor
	MTAP	S-methyl-5'-thioadenosine phosphorylase
	CDK2	Cyclin-dependent kinase 2
	CHEK1	Serine/threonine-protein kinase Chk1
	AURKA	Aurora kinase A
	PDPK1	3-phosphoinositide-dependent protein kinase 1
	IMPA1	Inositol monophosphatase 1
	AMY1A	Alpha-amylase 1
	AMY1B
	AMY1C
	REN	Renin
	CSNK1G2	Casein kinase I isoform gamma-2
	GSTP1	Glutathione S-transferase P
	PYGL	Glycogen phosphorylase, liver form
	NR1H2	Oxysterols receptor LXR-beta
deacetylasperulosidic acid	UCK2	Uridine-cytidine kinase 2
	BACE1	Beta-secretase 1
	ELANE	Neutrophil elastase
	IMPA1	Inositol monophosphatase 1
	IVD	Isovaleryl-CoA dehydrogenase, mitochondrial
	HEXB	Beta-hexosaminidase subunit beta
	MMP3	Stromelysin-1
	GSTA1	Glutathione S-transferase A1
	MME	Neprilysin
	OAT	Ornithine aminotransferase, mitochondrial
	RAB5A	Ras-related protein Rab-5A
	HSP90AA1	Heat shock protein HSP 90-alpha
	HRAS	GTPase HRas
	ABO	Histo-blood group ABO system transferase
	GSTP1	Glutathione S-transferase P
	PDPK1	3-phosphoinositide-dependent protein kinase 1
	SHBG	Sex hormone-binding globulin
	BTK	Tyrosine-protein kinase BTK
	RAP2A	Ras-related protein Rap-2a
	PCK1	Phosphoenolpyruvate carboxykinase, cytosolic [GTP]
	TGM3	Protein-glutamine gamma-glutamyltransferase E
	CYP2C9	Cytochrome P450 2C9
	HNMT	Histamine N-methyltransferase
	F2	Prothrombin
	PTPN1	Tyrosine-protein phosphatase non-receptor type 1
	FABP6	Gastrotropin
	KDR	Vascular endothelial growth factor receptor 2
	ALDH2	Aldehyde dehydrogenase, mitochondrial
	RAB9A	Ras-related protein Rab-9A
deacetylasperulosidic acid methyl ester	PLA2G10	Group 10 secretory phospholipase A2
	CCNA2	Cyclin-A2
	CTSS	Cathepsin S
	NUDT9	ADP-ribose pyrophosphatase, mitochondrial
	TREM1	Triggering receptor expressed on myeloid cells 1
	PDPK1	3-phosphoinositide-dependent protein kinase 1
	F2	Prothrombin
	TGFBR2	TGF-beta receptor type-2
	CDK2	Cyclin-dependent kinase 2
	AURKA	Aurora kinase A
	IMPA1	Inositol monophosphatase 1
	HSPA8	Heat shock cognate 71 kDa protein
	BCHE	Cholinesterase
	GBA	Glucosylceramidase
	FAP	Prolyl endopeptidase FAP
	AR	Androgen receptor
	EGFR	Epidermal growth factor receptor
	DDX6	Probable ATP-dependent RNA helicase DDX6
	CA2	Carbonic anhydrase 2
	PDE4B	cAMP-specific 3',5'-cyclic phosphodiesterase 4B
	CHEK1	Serine/threonine-protein kinase Chk1
	PPARG	Peroxisome proliferator-activated receptor gamma
	ESR1	Estrogen receptor
	AKR1B1	Aldose reductase
	PGR	Progesterone receptor
	CA12	Carbonic anhydrase 12
	ELANE	Neutrophil elastase
	ALDH2	Aldehyde dehydrogenase, mitochondrial
	DPP4	Dipeptidyl peptidase 4
digitolutein	CASP3	Caspase-3
	MAPK14	Mitogen-activated protein kinase 14
	AR	Androgen receptor
	MAP2K1	Dual specificity mitogen-activated protein kinase kinase 1
	KIT	Mast/stem cell growth factor receptor Kit
	PDE4D	cAMP-specific 3',5'-cyclic phosphodiesterase 4D
	CDK2	Cyclin-dependent kinase 2
	MMP3	Stromelysin-1
	ELANE	Neutrophil elastase
	AKR1B1	Aldose reductase
	ALB	Serum albumin
	PGA4	Pepsin A-4
	BACE1	Beta-secretase 1
	MME	Neprilysin
	JAK2	Tyrosine-protein kinase JAK2
	VDR	Vitamin D3 receptor
	HSD11B1	Corticosteroid 11-beta-dehydrogenase isozyme 1
	DHFR	Dihydrofolate reductase
	LCK	Tyrosine-protein kinase Lck
	METAP2	Methionine aminopeptidase 2
	GSK3B	Glycogen synthase kinase-3 beta
	CHEK1	Serine/threonine-protein kinase Chk1
	BRAF	Serine/threonine-protein kinase B-raf
	AKR1C3	Aldo-keto reductase family 1 member C3
	THRB	Thyroid hormone receptor beta
	PTPN1	Tyrosine-protein phosphatase non-receptor type 1
	NR1H4	Bile acid receptor
	FGFR1	Fibroblast growth factor receptor 1
	FKBP1A	Peptidyl-prolyl cis-trans isomerase FKBP1A
E-6-O-p-coumaroyl scandoside methyl ester	CTSD	Cathepsin D
	NUDT9	ADP-ribose pyrophosphatase, mitochondrial
	TREM1	Triggering receptor expressed on myeloid cells 1
	TGFBR2	TGF-beta receptor type-2
	HSPA8	Heat shock cognate 71 kDa protein
	BCHE	Cholinesterase
	AURKA	Aurora kinase A
	CA2	Carbonic anhydrase 2
	FAP	Prolyl endopeptidase FAP
	CDK2	Cyclin-dependent kinase 2
	CA12	Carbonic anhydrase 12
	ESR1	Estrogen receptor
	PDE4B	cAMP-specific 3',5'-cyclic phosphodiesterase 4B
	PDPK1	3-phosphoinositide-dependent protein kinase 1
	GBA	Glucosylceramidase
	MTAP	S-methyl-5'-thioadenosine phosphorylase
	PDE4D	cAMP-specific 3',5'-cyclic phosphodiesterase 4D
	CFD	Complement factor D
	CHEK1	Serine/threonine-protein kinase Chk1
	GSTP1	Glutathione S-transferase P
	AKR1B1	Aldose reductase
	ANXA5	Annexin A5
	IMPA1	Inositol monophosphatase 1
	SHBG	Sex hormone-binding globulin
	ANG	Angiogenin
	PIM1	Serine/threonine-protein kinase pim-1
	BRAF	Serine/threonine-protein kinase B-raf
	CES1	Liver carboxylesterase 1
	AMY1A	Alpha-amylase 1
	AMY1B
	AMY1C
E-6-O-p-feruloyl scandoside methyl ester	HEXB	Beta-hexosaminidase subunit beta
	HRAS	GTPase HRas
	BACE1	Beta-secretase 1
	UCK2	Uridine-cytidine kinase 2
	ABO	Histo-blood group ABO system transferase
	PDPK1	3-phosphoinositide-dependent protein kinase 1
	HSP90AA1	Heat shock protein HSP 90-alpha
	LCK	Tyrosine-protein kinase Lck
	CTSK	Cathepsin K
	RARA	Retinoic acid receptor alpha
	GLO1	Lactoylglutathione lyase
	HSD17B1	Estradiol 17-beta-dehydrogenase 1
	TGM3	Protein-glutamine gamma-glutamyltransferase E
	GSTP1	Glutathione S-transferase P
	GSTA1	Glutathione S-transferase A1
	BTK	Tyrosine-protein kinase BTK
	TTR	Transthyretin
	HADH	Hydroxyacyl-coenzyme A dehydrogenase, mitochondrial
	CA2	Carbonic anhydrase 2
	HNMT	Histamine N-methyltransferase
	PYGL	Glycogen phosphorylase, liver form
	RARG	Retinoic acid receptor gamma
	GNPDA1	Glucosamine-6-phosphate isomerase 1
	RXRB	Retinoic acid receptor RXR-beta
	IMPA1	Inositol monophosphatase 1
	GPI	Glucose-6-phosphate isomerase
	PPP1CC	Serine/threonine-protein phosphatase PP1-gamma catalytic subunit
	FKBP1A	Peptidyl-prolyl cis-trans isomerase FKBP1A
	INSR	Insulin receptor
ferulic acid	DCK	Deoxycytidine kinase
	UCK2	Uridine-cytidine kinase 2
	RAP2A	Ras-related protein Rap-2a
	CHEK1	Serine/threonine-protein kinase Chk1
	CTSK	Cathepsin K
	SULT2B1	Sulfotransferase family cytosolic 2B member 1
	GSTP1	Glutathione S-transferase P
	ARF6	ADP-ribosylation factor 6
	ARHGAP1	Rho GTPase-activating protein 1
	DTYMK	Thymidylate kinase
	RAF1	RAF proto-oncogene serine/threonine-protein kinase
	HRAS	GTPase HRas
	BACE1	Beta-secretase 1
	RFK	Riboflavin kinase
	CLK1	Dual specificity protein kinase CLK1
	KIF11	Kinesin-like protein KIF11
	HSD17B1	Estradiol 17-beta-dehydrogenase 1
	WARS	Tryptophan--tRNA ligase, cytoplasmic
	PAH	Phenylalanine-4-hydroxylase
	SRC	Proto-oncogene tyrosine-protein kinase Src
	AKT1	RAC-alpha serine/threonine-protein kinase
	BTK	Tyrosine-protein kinase BTK
	IMPDH2	Inosine-5'-monophosphate dehydrogenase 2
	GSS	Glutathione synthetase
	DDX39B	Spliceosome RNA helicase DDX39B
	RNASE2	Non-secretory ribonuclease
	GP1BA	Platelet glycoprotein Ib alpha chain
	RARG	Retinoic acid receptor gamma
	PTPN1	Tyrosine-protein phosphatase non-receptor type 1
gardenoside	BCHE	Cholinesterase
	PDE4B	cAMP-specific 3',5'-cyclic phosphodiesterase 4B
	CA1	Carbonic anhydrase 1
	NUDT9	ADP-ribose pyrophosphatase, mitochondrial
	TGFBR2	TGF-beta receptor type-2
	METAP1	Methionine aminopeptidase 1
	PIM1	Serine/threonine-protein kinase pim-1
	CA2	Carbonic anhydrase 2
	IMPA1	Inositol monophosphatase 1
	GBA	Glucosylceramidase
	DDX6	Probable ATP-dependent RNA helicase DDX6
	PPIA	Peptidyl-prolyl cis-trans isomerase A
	CA12	Carbonic anhydrase 12
	AURKA	Aurora kinase A
	HSPA8	Heat shock cognate 71 kDa protein
	CRAT	Carnitine O-acetyltransferase
	AMY1A	Alpha-amylase 1
	AMY1B
	AMY1C
	PYGL	Glycogen phosphorylase, liver form
	BCAT2	Branched-chain-amino-acid aminotransferase, mitochondrial
	MIF	Macrophage migration inhibitory factor
	LGALS7	Galectin-7
	LGALS7B
	ANG	Angiogenin
	HSP90AA1	Heat shock protein HSP 90-alpha
	CDK2	Cyclin-dependent kinase 2
	CTSB	Cathepsin B
	MTAP	S-methyl-5'-thioadenosine phosphorylase
	PNP	Purine nucleoside phosphorylase
	BAG1	BAG family molecular chaperone regulator 1
	CCNA2	Cyclin-A2
genipin	CA1	Carbonic anhydrase 1
	TGFBR2	TGF-beta receptor type-2
	BCHE	Cholinesterase
	CA2	Carbonic anhydrase 2
	HSP90AA1	Heat shock protein HSP 90-alpha
	ANG	Angiogenin
	BCAT2	Branched-chain-amino-acid aminotransferase, mitochondrial
	DHFR	Dihydrofolate reductase
	PIM1	Serine/threonine-protein kinase pim-1
	PDE4D	cAMP-specific 3',5'-cyclic phosphodiesterase 4D
	HSP90AA1	Heat shock protein HSP 90-alpha
	PLAU	Urokinase-type plasminogen activator
	PCK1	Phosphoenolpyruvate carboxykinase, cytosolic [GTP]
	CDA	Cytidine deaminase
	CFB	Complement factor B
	SOD2	Superoxide dismutase [Mn], mitochondrial
	ISG20	Interferon-stimulated gene 20 kDa protein
	CDK2	Cyclin-dependent kinase 2
	CCNA2	Cyclin-A2
	SRC	Proto-oncogene tyrosine-protein kinase Src
	DPP4	Dipeptidyl peptidase 4
	MAPK14	Mitogen-activated protein kinase 14
	ATOX1	Copper transport protein ATOX1
	PDPK1	3-phosphoinositide-dependent protein kinase 1
	F10	Coagulation factor X
	HSPA8	Heat shock cognate 71 kDa protein
	IMPDH2	Inosine-5'-monophosphate dehydrogenase 2
	PNP	Purine nucleoside phosphorylase
	HK1	Hexokinase-1
geniposide	CCNA2	Cyclin-A2
	NUDT9	ADP-ribose pyrophosphatase, mitochondrial
	AURKA	Aurora kinase A
	TGFBR2	TGF-beta receptor type-2
	TREM1	Triggering receptor expressed on myeloid cells 1
	CDK2	Cyclin-dependent kinase 2
	BCHE	Cholinesterase
	FAP	Prolyl endopeptidase FAP
	IMPA1	Inositol monophosphatase 1
	CTSD	Cathepsin D
	PNP	Purine nucleoside phosphorylase
	PGR	Progesterone receptor
	PDE4B	cAMP-specific 3',5'-cyclic phosphodiesterase 4B
	GBA	Glucosylceramidase
	CA2	Carbonic anhydrase 2
	CA12	Carbonic anhydrase 12
	MTAP	S-methyl-5'-thioadenosine phosphorylase
	NR1H2	Oxysterols receptor LXR-beta
	GSTP1	Glutathione S-transferase P
	PPARG	Peroxisome proliferator-activated receptor gamma
	PDPK1	3-phosphoinositide-dependent protein kinase 1
	AR	Androgen receptor
	PIM1	Serine/threonine-protein kinase pim-1
	HSP90AA1	Heat shock protein HSP 90-alpha
	AKR1B1	Aldose reductase
	PDE4D	cAMP-specific 3',5'-cyclic phosphodiesterase 4D
	C1R	Complement C1r subcomponent
	ANG	Angiogenin
	PYGL	Glycogen phosphorylase, liver form
geniposidic acid	BCHE	Cholinesterase
	CCNA2	Cyclin-A2
	NUDT9	ADP-ribose pyrophosphatase, mitochondrial
	AURKA	Aurora kinase A
	TGFBR2	TGF-beta receptor type-2
	CDK2	Cyclin-dependent kinase 2
	TREM1	Triggering receptor expressed on myeloid cells 1
	FAP	Prolyl endopeptidase FAP
	RIDA	2-iminobutanoate/2-iminopropanoate deaminase
	IMPA1	Inositol monophosphatase 1
	CA2	Carbonic anhydrase 2
	SNRPA	U1 small nuclear ribonucleoprotein A
	PNP	Purine nucleoside phosphorylase
	PDE4B	cAMP-specific 3',5'-cyclic phosphodiesterase 4B
	PNPO	Pyridoxine-5'-phosphate oxidase
	GBA	Glucosylceramidase
	F2	Prothrombin
	CA12	Carbonic anhydrase 12
	MTAP	S-methyl-5'-thioadenosine phosphorylase
	NR1H2	Oxysterols receptor LXR-beta
	MAOB	Amine oxidase [flavin-containing] B
	PGR	Progesterone receptor
	EGFR	Epidermal growth factor receptor
	GSTP1	Glutathione S-transferase P
	PPARG	Peroxisome proliferator-activated receptor gamma
	PDPK1	3-phosphoinositide-dependent protein kinase 1
	AR	Androgen receptor
	PSPH	Phosphoserine phosphatase
	PIM1	Serine/threonine-protein kinase pim-1
isoquercitrin	TTR	Transthyretin
	TREM1	Triggering receptor expressed on myeloid cells 1
	BCHE	Cholinesterase
	ESR2	Estrogen receptor beta
	NUDT9	ADP-ribose pyrophosphatase, mitochondrial
	CA2	Carbonic anhydrase 2
	TGFBR2	TGF-beta receptor type-2
	PPIA	Peptidyl-prolyl cis-trans isomerase A
	HCK	Tyrosine-protein kinase HCK
	MAPK10	Mitogen-activated protein kinase 10
	AURKA	Aurora kinase A
	AR	Androgen receptor
	EGFR	Epidermal growth factor receptor
	CDK2	Cyclin-dependent kinase 2
	IMPA1	Inositol monophosphatase 1
	PNP	Purine nucleoside phosphorylase
	GSTP1	Glutathione S-transferase P
	STS	Steryl-sulfatase
	PIM1	Serine/threonine-protein kinase pim-1
	APOA2	Apolipoprotein A-II
	ESR1	Estrogen receptor
	PDE4B	cAMP-specific 3',5'-cyclic phosphodiesterase 4B
	CA12	Carbonic anhydrase 12
	GSR	Glutathione reductase, mitochondrial
	NQO2	Ribosyldihydronicotinamide dehydrogenase [quinone]
	MAPK8	Mitogen-activated protein kinase 8
	CFB	Complement factor B
	MAPK1	Mitogen-activated protein kinase 1
	MTAP	S-methyl-5'-thioadenosine phosphorylase
oleanolic acid	ALB	Serum albumin
	STS	Steryl-sulfatase
	KDR	Vascular endothelial growth factor receptor 2
	MAPK10	Mitogen-activated protein kinase 10
	BMP2	Bone morphogenetic protein 2
	THRB	Thyroid hormone receptor beta
	MAOB	Amine oxidase [flavin-containing] B
	MMP13	Collagenase 3
	PIM1	Serine/threonine-protein kinase pim-1
	MAPKAPK2	MAP kinase-activated protein kinase 2
	APOA2	Apolipoprotein A-II
	AKR1C2	Aldo-keto reductase family 1 member C2
	HSD17B11	Estradiol 17-beta-dehydrogenase 11
	CFB	Complement factor B
	PPIA	Peptidyl-prolyl cis-trans isomerase A
	CA2	Carbonic anhydrase 2
	KIF11	Kinesin-like protein KIF11
	BCHE	Cholinesterase
	GC	Vitamin D-binding protein
	ITGAL	Integrin alpha-L
	F2	Prothrombin
	CASP7	Caspase-7
	BACE1	Beta-secretase 1
	PGR	Progesterone receptor
	MAPK1	Mitogen-activated protein kinase 1
	RORA	Nuclear receptor ROR-alpha
	NR3C2	Mineralocorticoid receptor
	AR	Androgen receptor
	HSD11B1	Corticosteroid 11-beta-dehydrogenase isozyme 1
oleanolic acid-28-O-β-D-glucopyranoside	AKR1C2	Aldo-keto reductase family 1 member C2
	ITGAL	Integrin alpha-L
	BMP2	Bone morphogenetic protein 2
	CHEK1	Serine/threonine-protein kinase Chk1
	CA2	Carbonic anhydrase 2
	STS	Steryl-sulfatase
	BCHE	Cholinesterase
	HSD17B11	Estradiol 17-beta-dehydrogenase 11
	TTR	Transthyretin
	MTAP	S-methyl-5'-thioadenosine phosphorylase
	HCK	Tyrosine-protein kinase HCK
	ALB	Serum albumin
	CFB	Complement factor B
	PGR	Progesterone receptor
	BACE1	Beta-secretase 1
	GBA	Glucosylceramidase
	CA12	Carbonic anhydrase 12
	AR	Androgen receptor
	MMP13	Collagenase 3
	PDE4B	cAMP-specific 3',5'-cyclic phosphodiesterase 4B
	MAPK10	Mitogen-activated protein kinase 10
	GC	Vitamin D-binding protein
	F2	Prothrombin
	HSD17B1	Estradiol 17-beta-dehydrogenase 1
	EPHB4	Ephrin type-B receptor 4
	PIM1	Serine/threonine-protein kinase pim-1
	APOA2	Apolipoprotein A-II
	KIF11	Kinesin-like protein KIF11
	PPIA	Peptidyl-prolyl cis-trans isomerase A
oleanolic acid-3-O-β-D-glucuronopyranoside	STS	Steryl-sulfatase
	ALB	Serum albumin
	KDR	Vascular endothelial growth factor receptor 2
	MAPK10	Mitogen-activated protein kinase 10
	MAPKAPK2	MAP kinase-activated protein kinase 2
	BMP2	Bone morphogenetic protein 2
	KIF11	Kinesin-like protein KIF11
	AKR1C2	Aldo-keto reductase family 1 member C2
	PIM1	Serine/threonine-protein kinase pim-1
	MAOB	Amine oxidase [flavin-containing] B
	PPIA	Peptidyl-prolyl cis-trans isomerase A
	MAPK1	Mitogen-activated protein kinase 1
	TTR	Transthyretin
	BCHE	Cholinesterase
	CA2	Carbonic anhydrase 2
	CASP7	Caspase-7
	APOA2	Apolipoprotein A-II
	GC	Vitamin D-binding protein
	MAPK14	Mitogen-activated protein kinase 14
	PGR	Progesterone receptor
	MMP13	Collagenase 3
	ITGAL	Integrin alpha-L
	RORA	Nuclear receptor ROR-alpha
	NQO2	Ribosyldihydronicotinamide dehydrogenase [quinone]
	HSD17B1	Estradiol 17-beta-dehydrogenase 1
	ESR1	Estrogen receptor
	THRB	Thyroid hormone receptor beta
	GSTP1	Glutathione S-transferase P
	SEC14L2	SEC14-like protein 2
panasenoside	HCK	Tyrosine-protein kinase HCK
	SELP	P-selectin
	PPIA	Peptidyl-prolyl cis-trans isomerase A
	BCHE	Cholinesterase
	ESR2	Estrogen receptor beta
	CTSD	Cathepsin D
	ICAM2	Intercellular adhesion molecule 2
	TTR	Transthyretin
	CA2	Carbonic anhydrase 2
	GSTP1	Glutathione S-transferase P
	GBA	Glucosylceramidase
	HSD17B1	Estradiol 17-beta-dehydrogenase 1
	AR	Androgen receptor
	MAPK10	Mitogen-activated protein kinase 10
	AURKA	Aurora kinase A
	CA1	Carbonic anhydrase 1
	AKR1C2	Aldo-keto reductase family 1 member C2
	BMP2	Bone morphogenetic protein 2
	MTAP	S-methyl-5'-thioadenosine phosphorylase
	PNP	Purine nucleoside phosphorylase
	C1R	Complement C1r subcomponent
	NR1H2	Oxysterols receptor LXR-beta
	STS	Steryl-sulfatase
	APOA2	Apolipoprotein A-II
	ESR1	Estrogen receptor
	KIF11	Kinesin-like protein KIF11
	PPP5C	Serine/threonine-protein phosphatase 5
	CFD	Complement factor D
	CHEK1	Serine/threonine-protein kinase Chk1
p-coumaric acid	DCK	Deoxycytidine kinase
	UCK2	Uridine-cytidine kinase 2
	PTPN1	Tyrosine-protein phosphatase non-receptor type 1
	PDPK1	3-phosphoinositide-dependent protein kinase 1
	HSP90AA1	Heat shock protein HSP 90-alpha
	HRAS	GTPase HRas
	RAF1	RAF proto-oncogene serine/threonine-protein kinase
	BCAT2	Branched-chain-amino-acid aminotransferase, mitochondrial
	KIF11	Kinesin-like protein KIF11
	SRC	Proto-oncogene tyrosine-protein kinase Src
	RAC1	Ras-related C3 botulinum toxin substrate 1
	PRKACA	cAMP-dependent protein kinase catalytic subunit alpha
	KDR	Vascular endothelial growth factor receptor 2
	CASP3	Caspase-3
	GSK3B	Glycogen synthase kinase-3 beta
	HSD17B1	Estradiol 17-beta-dehydrogenase 1
	HSP90AA1	Heat shock protein HSP 90-alpha
	RARG	Retinoic acid receptor gamma
	CHEK1	Serine/threonine-protein kinase Chk1
	PIM1	Serine/threonine-protein kinase pim-1
	KIT	Mast/stem cell growth factor receptor Kit
	AKR1B1	Aldose reductase
	YARS	Tyrosine--tRNA ligase, cytoplasmic
	THRA	Thyroid hormone receptor alpha
	CDK6	Cyclin-dependent kinase 6
	GSTP1	Glutathione S-transferase P
	AKT2	RAC-beta serine/threonine-protein kinase
	RAC2	Ras-related C3 botulinum toxin substrate 2
	RAP2A	Ras-related protein Rap-2a
poriferasterol	TTPA	Alpha-tocopherol transfer protein
	HSD17B1	Estradiol 17-beta-dehydrogenase 1
	CRABP2	Cellular retinoic acid-binding protein 2
	RORA	Nuclear receptor ROR-alpha
	RBP4	Retinol-binding protein 4
	SEC14L2	SEC14-like protein 2
	SULT2B1	Sulfotransferase family cytosolic 2B member 1
	MAP2K1	Dual specificity mitogen-activated protein kinase kinase 1
	SHBG	Sex hormone-binding globulin
	TTR	Transthyretin
	TRAPPC3	Trafficking protein particle complex subunit 3
	MAOB	Amine oxidase [flavin-containing] B
	MAPK14	Mitogen-activated protein kinase 14
	FECH	Ferrochelatase, mitochondrial
	RXRB	Retinoic acid receptor RXR-beta
	RARG	Retinoic acid receptor gamma
	METAP2	Methionine aminopeptidase 2
	HPGDS	Hematopoietic prostaglandin D synthase
	ADK	Adenosine kinase
	FABP6	Gastrotropin
	NR3C2	Mineralocorticoid receptor
	RARB	Retinoic acid receptor beta
	AR	Androgen receptor
	DHODH	Dihydroorotate dehydrogenase (quinone), mitochondrial
	PGR	Progesterone receptor
	NR1H4	Bile acid receptor
	ADH5	Alcohol dehydrogenase class-3
	ALB	Serum albumin
	FABP3	Fatty acid-binding protein, heart
quercetin	HRAS	GTPase HRas
	UCK2	Uridine-cytidine kinase 2
	PDE4D	cAMP-specific 3',5'-cyclic phosphodiesterase 4D
	HCK	Tyrosine-protein kinase HCK
	NT5M	5'(3')-deoxyribonucleotidase, mitochondrial
	GSTP1	Glutathione S-transferase P
	CDK2	Cyclin-dependent kinase 2
	HSP90AA1	Heat shock protein HSP 90-alpha
	ADH5	Alcohol dehydrogenase class-3
	SRC	Proto-oncogene tyrosine-protein kinase Src
	SULT2B1	Sulfotransferase family cytosolic 2B member 1
	KDR	Vascular endothelial growth factor receptor 2
	ELANE	Neutrophil elastase
	INSR	Insulin receptor
	PDPK1	3-phosphoinositide-dependent protein kinase 1
	VDR	Vitamin D3 receptor
	SHBG	Sex hormone-binding globulin
	AKR1B1	Aldose reductase
	GSK3B	Glycogen synthase kinase-3 beta
	AURKA	Aurora kinase A
	MME	Neprilysin
	DHODH	Dihydroorotate dehydrogenase (quinone), mitochondrial
	PDE5A	cGMP-specific 3',5'-cyclic phosphodiesterase
	GSTA3	Glutathione S-transferase A3
	BACE1	Beta-secretase 1
	AKR1C3	Aldo-keto reductase family 1 member C3
	CTSK	Cathepsin K
	SELE	E-selectin
	CASP1	Caspase-1
quercetin-3-O-(2''-O-β-D-glucopyranosyl)-β-D-galactopyranoside	LGALS3	Galectin-3
	ABO	Histo-blood group ABO system transferase
	HRAS	GTPase HRas
	HEXB	Beta-hexosaminidase subunit beta
	IMPA1	Inositol monophosphatase 1
	RFK	Riboflavin kinase
	LCK	Tyrosine-protein kinase Lck
	AURKA	Aurora kinase A
	ARF6	ADP-ribosylation factor 6
	RAB5A	Ras-related protein Rab-5A
	PCK1	Phosphoenolpyruvate carboxykinase, cytosolic [GTP]
	ARL5B	ADP-ribosylation factor-like protein 5B
	ADK	Adenosine kinase
	EEA1	Early endosome antigen 1
	GSTM1	Glutathione S-transferase Mu 1
	HSP90AA1	Heat shock protein HSP 90-alpha
	PDPK1	3-phosphoinositide-dependent protein kinase 1
	GSTP1	Glutathione S-transferase P
	AHCY	Adenosylhomocysteinase
	OAT	Ornithine aminotransferase, mitochondrial
	DAPK1	Death-associated protein kinase 1
	MAPKAPK2	MAP kinase-activated protein kinase 2
	GSR	Glutathione reductase, mitochondrial
	GSTM2	Glutathione S-transferase Mu 2
	UCK2	Uridine-cytidine kinase 2
	HSD17B1	Estradiol 17-beta-dehydrogenase 1
	FDPS	Farnesyl pyrophosphate synthase
	BACE1	Beta-secretase 1
	MAN1B1	Endoplasmic reticulum mannosyl-oligosaccharide 1,2-alpha-mannosidase
quercetin-3-O-sambubioside	LGALS3	Galectin-3
	HEXB	Beta-hexosaminidase subunit beta
	ABO	Histo-blood group ABO system transferase
	HRAS	GTPase HRas
	LCK	Tyrosine-protein kinase Lck
	DCK	Deoxycytidine kinase
	DAPK1	Death-associated protein kinase 1
	PNMT	Phenylethanolamine N-methyltransferase
	UCK2	Uridine-cytidine kinase 2
	DTYMK	Thymidylate kinase
	GSTP1	Glutathione S-transferase P
	HSD17B1	Estradiol 17-beta-dehydrogenase 1
	FGG	Fibrinogen gamma chain
	PIK3R1	Phosphatidylinositol 3-kinase regulatory subunit alpha
	LCN2	Neutrophil gelatinase-associated lipocalin
	KAT2B	Histone acetyltransferase KAT2B
	DUT	Deoxyuridine 5'-triphosphate nucleotidohydrolase, mitochondrial
	AKT1	RAC-alpha serine/threonine-protein kinase
	EIF4E	Eukaryotic translation initiation factor 4E
	MAPKAPK2	MAP kinase-activated protein kinase 2
	UAP1	UDP-N-acetylhexosamine pyrophosphorylase
	CTSK	Cathepsin K
	SULT2B1	Sulfotransferase family cytosolic 2B member 1
	ARF6	ADP-ribosylation factor 6
	TAP1	Antigen peptide transporter 1
	BTK	Tyrosine-protein kinase BTK
	SIRT5	NAD-dependent protein deacylase sirtuin-5, mitochondrial
	AMD1	S-adenosylmethionine decarboxylase proenzyme
	EEA1	Early endosome antigen 1
quercetin-3-sophoroside	ABO	Histo-blood group ABO system transferase
	HRAS	GTPase HRas
	HEXB	Beta-hexosaminidase subunit beta
	GSTP1	Glutathione S-transferase P
	UCK2	Uridine-cytidine kinase 2
	NT5M	5'(3')-deoxyribonucleotidase, mitochondrial
	SULT2B1	Sulfotransferase family cytosolic 2B member 1
	CTSK	Cathepsin K
	GNPDA1	Glucosamine-6-phosphate isomerase 1
	HADH	Hydroxyacyl-coenzyme A dehydrogenase, mitochondrial
	BACE1	Beta-secretase 1
	PDE4B	cAMP-specific 3',5'-cyclic phosphodiesterase 4B
	RAP2A	Ras-related protein Rap-2a
	HSD11B1	Corticosteroid 11-beta-dehydrogenase isozyme 1
	GSK3B	Glycogen synthase kinase-3 beta
	SIRT5	NAD-dependent protein deacylase sirtuin-5, mitochondrial
	SULT2A1	Bile salt sulfotransferase
	LCK	Tyrosine-protein kinase Lck
	AKT1	RAC-alpha serine/threonine-protein kinase
	TGM3	Protein-glutamine gamma-glutamyltransferase E
	FABP3	Fatty acid-binding protein, heart
	PCK1	Phosphoenolpyruvate carboxykinase, cytosolic [GTP]
	MAN1B1	Endoplasmic reticulum mannosyl-oligosaccharide 1,2-alpha-mannosidase
	RNASE3	Eosinophil cationic protein
	HMGCR	3-hydroxy-3-methylglutaryl-coenzyme A reductase
	GSTA1	Glutathione S-transferase A1
	PNMT	Phenylethanolamine N-methyltransferase
	AKR1C3	Aldo-keto reductase family 1 member C3
	RFK	Riboflavin kinase
rutin	DCK	Deoxycytidine kinase
	BTK	Tyrosine-protein kinase BTK
	ABO	Histo-blood group ABO system transferase
	HPRT1	Hypoxanthine-guanine phosphoribosyltransferase
	GSTP1	Glutathione S-transferase P
	HSP90AA1	Heat shock protein HSP 90-alpha
	ELANE	Neutrophil elastase
	DAPK1	Death-associated protein kinase 1
	ARF6	ADP-ribosylation factor 6
	AKR1B1	Aldose reductase
	LGALS3	Galectin-3
	SULT2B1	Sulfotransferase family cytosolic 2B member 1
	BACE1	Beta-secretase 1
	CHIT1	Chitotriosidase-1
	MAN1B1	Endoplasmic reticulum mannosyl-oligosaccharide 1,2-alpha-mannosidase
	CDK2	Cyclin-dependent kinase 2
	BST1	ADP-ribosyl cyclase/cyclic ADP-ribose hydrolase 2
	ATIC	Bifunctional purine biosynthesis protein PURH
	HRAS	GTPase HRas
	ERI1	3'-5' exoribonuclease 1
	PCK1	Phosphoenolpyruvate carboxykinase, cytosolic [GTP]
	AURKA	Aurora kinase A
	GMPR2	GMP reductase 2
	RAP2A	Ras-related protein Rap-2a
	TAP1	Antigen peptide transporter 1
	GSTM2	Glutathione S-transferase Mu 2
	ADK	Adenosine kinase
	THRA	Thyroid hormone receptor alpha
	GLTP	Glycolipid transfer protein
scandoside	HEXB	Beta-hexosaminidase subunit beta
	BACE1	Beta-secretase 1
	ALB	Serum albumin
	UCK2	Uridine-cytidine kinase 2
	HRAS	GTPase HRas
	OAT	Ornithine aminotransferase, mitochondrial
	GSTA1	Glutathione S-transferase A1
	SULT2B1	Sulfotransferase family cytosolic 2B member 1
	HSP90AA1	Heat shock protein HSP 90-alpha
	ABO	Histo-blood group ABO system transferase
	PCK1	Phosphoenolpyruvate carboxykinase, cytosolic [GTP]
	PDPK1	3-phosphoinositide-dependent protein kinase 1
	GSTP1	Glutathione S-transferase P
	ELANE	Neutrophil elastase
	HSD17B1	Estradiol 17-beta-dehydrogenase 1
	MMP3	Stromelysin-1
	TGM3	Protein-glutamine gamma-glutamyltransferase E
	CASP1	Caspase-1
	SHBG	Sex hormone-binding globulin
	EIF4E	Eukaryotic translation initiation factor 4E
	HADH	Hydroxyacyl-coenzyme A dehydrogenase, mitochondrial
	IVD	Isovaleryl-CoA dehydrogenase, mitochondrial
	PTPN1	Tyrosine-protein phosphatase non-receptor type 1
	CDK2	Cyclin-dependent kinase 2
	SOD2	Superoxide dismutase [Mn], mitochondrial
	ARF6	ADP-ribosylation factor 6
	FABP6	Gastrotropin
	ADAM33	Disintegrin and metalloproteinase domain-containing protein 33
	AURKA	Aurora kinase A
scandoside methyl ester	HRAS	GTPase HRas
	ABO	Histo-blood group ABO system transferase
	BACE1	Beta-secretase 1
	IMPA1	Inositol monophosphatase 1
	PDE4D	cAMP-specific 3',5'-cyclic phosphodiesterase 4D
	HEXB	Beta-hexosaminidase subunit beta
	GSTA1	Glutathione S-transferase A1
	ARF6	ADP-ribosylation factor 6
	UCK2	Uridine-cytidine kinase 2
	SHBG	Sex hormone-binding globulin
	TGM3	Protein-glutamine gamma-glutamyltransferase E
	HSP90AA1	Heat shock protein HSP 90-alpha
	DAPK1	Death-associated protein kinase 1
	ELANE	Neutrophil elastase
	PDPK1	3-phosphoinositide-dependent protein kinase 1
	HNMT	Histamine N-methyltransferase
	PTPN1	Tyrosine-protein phosphatase non-receptor type 1
	RFK	Riboflavin kinase
	LGALS3	Galectin-3
	FABP6	Gastrotropin
	KDR	Vascular endothelial growth factor receptor 2
	ALDH2	Aldehyde dehydrogenase, mitochondrial
	MMP3	Stromelysin-1
	HADH	Hydroxyacyl-coenzyme A dehydrogenase, mitochondrial
	CDK2	Cyclin-dependent kinase 2
	GART	Trifunctional purine biosynthetic protein adenosine-3
	AURKA	Aurora kinase A
	ADAM33	Disintegrin and metalloproteinase domain-containing protein 33
	AR	Androgen receptor
scopoletol	PNMT	Phenylethanolamine N-methyltransferase
	FKBP1A	Peptidyl-prolyl cis-trans isomerase FKBP1A
	APAF1	Apoptotic protease-activating factor 1
	GPI	Glucose-6-phosphate isomerase
	NR1I2	Nuclear receptor subfamily 1 group I member 2
	FECH	Ferrochelatase, mitochondrial
	BTK	Tyrosine-protein kinase BTK
	REN	Renin
	ELANE	Neutrophil elastase
	DAPK1	Death-associated protein kinase 1
	BHMT	Betaine--homocysteine S-methyltransferase 1
	MMP3	Stromelysin-1
	HSP90AA1	Heat shock protein HSP 90-alpha
	ALB	Serum albumin
	KDR	Vascular endothelial growth factor receptor 2
	F2	Prothrombin
	BACE1	Beta-secretase 1
	CA2	Carbonic anhydrase 2
	CCNA2	Cyclin-A2
	CDK2	Cyclin-dependent kinase 2
	AKR1B1	Aldose reductase
	METAP2	Methionine aminopeptidase 2
	MME	Neprilysin
	PTPN1	Tyrosine-protein phosphatase non-receptor type 1
	ABO	Histo-blood group ABO system transferase
	OAT	Ornithine aminotransferase, mitochondrial
	CA1	Carbonic anhydrase 1
	DPP4	Dipeptidyl peptidase 4
	PDE4D	cAMP-specific 3',5'-cyclic phosphodiesterase 4D
sitogluside	RBP4	Retinol-binding protein 4
	TTR	Transthyretin
	CRABP2	Cellular retinoic acid-binding protein 2
	IMPA1	Inositol monophosphatase 1
	TGM3	Protein-glutamine gamma-glutamyltransferase E
	TTPA	Alpha-tocopherol transfer protein
	GSTT2B	Glutathione S-transferase theta-2B
	FABP6	Gastrotropin
	PTPN1	Tyrosine-protein phosphatase non-receptor type 1
	RXRB	Retinoic acid receptor RXR-beta
	MAP2K1	Dual specificity mitogen-activated protein kinase kinase 1
	AR	Androgen receptor
	HEXB	Beta-hexosaminidase subunit beta
	ALB	Serum albumin
	HSD17B1	Estradiol 17-beta-dehydrogenase 1
	RARG	Retinoic acid receptor gamma
	PPP1CC	Serine/threonine-protein phosphatase PP1-gamma catalytic subunit
	CA2	Carbonic anhydrase 2
	FECH	Ferrochelatase, mitochondrial
	RORA	Nuclear receptor ROR-alpha
	TRAPPC3	Trafficking protein particle complex subunit 3
	ARF6	ADP-ribosylation factor 6
	IL2	Interleukin-2
	FABP7	Fatty acid-binding protein, brain
	MAOB	Amine oxidase [flavin-containing] B
	F2	Prothrombin
	HSP90AA1	Heat shock protein HSP 90-alpha
	SULT2B1	Sulfotransferase family cytosolic 2B member 1
	GSTP1	Glutathione S-transferase P
stigmasterol	TTPA	Alpha-tocopherol transfer protein
	MAP2K1	Dual specificity mitogen-activated protein kinase kinase 1
	HSD17B1	Estradiol 17-beta-dehydrogenase 1
	RORA	Nuclear receptor ROR-alpha
	CRABP2	Cellular retinoic acid-binding protein 2
	SULT2B1	Sulfotransferase family cytosolic 2B member 1
	TTR	Transthyretin
	SHBG	Sex hormone-binding globulin
	MAOB	Amine oxidase [flavin-containing] B
	RXRB	Retinoic acid receptor RXR-beta
	FECH	Ferrochelatase, mitochondrial
	HPGDS	Hematopoietic prostaglandin D synthase
	SEC14L2	SEC14-like protein 2
	RARG	Retinoic acid receptor gamma
	TRAPPC3	Trafficking protein particle complex subunit 3
	RBP4	Retinol-binding protein 4
	ADK	Adenosine kinase
	MAPK14	Mitogen-activated protein kinase 14
	FABP6	Gastrotropin
	FABP7	Fatty acid-binding protein, brain
	RARB	Retinoic acid receptor beta
	AR	Androgen receptor
	PGR	Progesterone receptor
	NR1H4	Bile acid receptor
	HSD11B1	Corticosteroid 11-beta-dehydrogenase isozyme 1
	VDR	Vitamin D3 receptor
	GSTA1	Glutathione S-transferase A1
	ALB	Serum albumin
	MAPK10	Mitogen-activated protein kinase 10
stigmasterol-β-D-glucoside	RXRB	Retinoic acid receptor RXR-beta
	HEXB	Beta-hexosaminidase subunit beta
	TGM3	Protein-glutamine gamma-glutamyltransferase E
	RBP4	Retinol-binding protein 4
	GSTP1	Glutathione S-transferase P
	FABP7	Fatty acid-binding protein, brain
	RXRA	Retinoic acid receptor RXR-alpha
	HSD17B1	Estradiol 17-beta-dehydrogenase 1
	VDR	Vitamin D3 receptor
	TTPA	Alpha-tocopherol transfer protein
	IL2	Interleukin-2
	LGALS3	Galectin-3
	TTR	Transthyretin
	PLA2G2A	Phospholipase A2, membrane associated
	FABP3	Fatty acid-binding protein, heart
	ABO	Histo-blood group ABO system transferase
	HK1	Hexokinase-1
	HSD11B1	Corticosteroid 11-beta-dehydrogenase isozyme 1
	FABP6	Gastrotropin
	THRB	Thyroid hormone receptor beta
	DPEP1	Dipeptidase 1
	PROCR	Endothelial protein C receptor
	GMPR2	GMP reductase 2
	ALB	Serum albumin
	AR	Androgen receptor
	NR1I2	Nuclear receptor subfamily 1 group I member 2
	HRAS	GTPase HRas
	RARB	Retinoic acid receptor beta
	PGR	Progesterone receptor
succinic acid	CPB1	Carboxypeptidase B
	APCS	Serum amyloid P-component
	SRC	Proto-oncogene tyrosine-protein kinase Src
	OTC	Ornithine carbamoyltransferase, mitochondrial
	ME2	NAD-dependent malic enzyme, mitochondrial
	RNASE3	Eosinophil cationic protein
	UMPS	Uridine 5'-monophosphate synthase
	TK1	Thymidine kinase, cytosolic
	ARHGAP1	Rho GTPase-activating protein 1
	HSPA8	Heat shock cognate 71 kDa protein
	CAT	Catalase
	ANG	Angiogenin
	PCK1	Phosphoenolpyruvate carboxykinase, cytosolic [GTP]
	PPP1CC	Serine/threonine-protein phosphatase PP1-gamma catalytic subunit
	CA2	Carbonic anhydrase 2
	MMP3	Stromelysin-1
	MMP12	Macrophage metalloelastase
	FDPS	Farnesyl pyrophosphate synthase
	ARSA	Arylsulfatase A
	CCNA2	Cyclin-A2
	ARF4	ADP-ribosylation factor 4
	CTSK	Cathepsin K
	PLA2G2A	Phospholipase A2, membrane associated
	PAPSS1	Bifunctional 3'-phosphoadenosine 5'-phosphosulfate synthase 1
	C1S	Complement C1s subcomponent
	ABL1	Tyrosine-protein kinase ABL1
	GSTM1	Glutathione S-transferase Mu 1
	GSTT2B	Glutathione S-transferase theta-2B
	CCL5	C-C motif chemokine 5
trans-4-methoxycinnamyl alcohol	PIM1	Serine/threonine-protein kinase pim-1
	PPIA	Peptidyl-prolyl cis-trans isomerase A
	CA2	Carbonic anhydrase 2
	YARS	Tyrosine--tRNA ligase, cytoplasmic
	CDK2	Cyclin-dependent kinase 2
	PTPN1	Tyrosine-protein phosphatase non-receptor type 1
	MAPK14	Mitogen-activated protein kinase 14
	HSD11B1	Corticosteroid 11-beta-dehydrogenase isozyme 1
	PDE4D	cAMP-specific 3',5'-cyclic phosphodiesterase 4D
	CASP7	Caspase-7
	PDPK1	3-phosphoinositide-dependent protein kinase 1
	AKR1B1	Aldose reductase
	PDE4B	cAMP-specific 3',5'-cyclic phosphodiesterase 4B
	METAP2	Methionine aminopeptidase 2
	HCK	Tyrosine-protein kinase HCK
	DPP4	Dipeptidyl peptidase 4
	BST1	ADP-ribosyl cyclase/cyclic ADP-ribose hydrolase 2
	CCNA2	Cyclin-A2
	KDR	Vascular endothelial growth factor receptor 2
	ERBB4	Receptor tyrosine-protein kinase erbB-4
	AGXT	Serine--pyruvate aminotransferase
	JAK2	Tyrosine-protein kinase JAK2
	FGFR1	Fibroblast growth factor receptor 1
	GSK3B	Glycogen synthase kinase-3 beta
	DHFR	Dihydrofolate reductase
	DPEP1	Dipeptidase 1
	TEK	Angiopoietin-1 receptor
	DCK	Deoxycytidine kinase
	DTYMK	Thymidylate kinase
ursolic acid	ALB	Serum albumin
	STS	Steryl-sulfatase
	MAOB	Amine oxidase [flavin-containing] B
	THRB	Thyroid hormone receptor beta
	KDR	Vascular endothelial growth factor receptor 2
	MAPK10	Mitogen-activated protein kinase 10
	BMP2	Bone morphogenetic protein 2
	MMP13	Collagenase 3
	PIM1	Serine/threonine-protein kinase pim-1
	MAPKAPK2	MAP kinase-activated protein kinase 2
	APOA2	Apolipoprotein A-II
	PPIA	Peptidyl-prolyl cis-trans isomerase A
	AKR1C2	Aldo-keto reductase family 1 member C2
	KIF11	Kinesin-like protein KIF11
	CA2	Carbonic anhydrase 2
	BCHE	Cholinesterase
	HSD17B11	Estradiol 17-beta-dehydrogenase 11
	ITGAL	Integrin alpha-L
	F2	Prothrombin
	CFB	Complement factor B
	GC	Vitamin D-binding protein
	CASP7	Caspase-7
	CES1	Liver carboxylesterase 1
	CCNA2	Cyclin-A2
	CASP3	Caspase-3
	MAPK14	Mitogen-activated protein kinase 14
	PGR	Progesterone receptor
	RORA	Nuclear receptor ROR-alpha
	HSD17B1	Estradiol 17-beta-dehydrogenase 1
Z-6-O-p-coumaroyl scandoside methyl ester	TTR	Transthyretin
	FAP	Prolyl endopeptidase FAP
	MAPK10	Mitogen-activated protein kinase 10
	NUDT9	ADP-ribose pyrophosphatase, mitochondrial
	TREM1	Triggering receptor expressed on myeloid cells 1
	BCHE	Cholinesterase
	TGFBR2	TGF-beta receptor type-2
	GBA	Glucosylceramidase
	CDK2	Cyclin-dependent kinase 2
	CHEK1	Serine/threonine-protein kinase Chk1
	MAPK14	Mitogen-activated protein kinase 14
	CA12	Carbonic anhydrase 12
	PPARD	Peroxisome proliferator-activated receptor delta
	ANG	Angiogenin
	ESR1	Estrogen receptor
	GSTP1	Glutathione S-transferase P
	PIM1	Serine/threonine-protein kinase pim-1
	CA2	Carbonic anhydrase 2
	PDE4D	cAMP-specific 3',5'-cyclic phosphodiesterase 4D
	MTAP	S-methyl-5'-thioadenosine phosphorylase
	CFB	Complement factor B
	RTN4R	Reticulon-4 receptor
	CFD	Complement factor D
	F2	Prothrombin
	SHBG	Sex hormone-binding globulin
	CCNA2	Cyclin-A2
	CA1	Carbonic anhydrase 1
	AMY1A	Alpha-amylase 1
	AMY1B
	AMY1C
	PNP	Purine nucleoside phosphorylase
β-sitosterol	BMP2	Bone morphogenetic protein 2
	MAOB	Amine oxidase [flavin-containing] B
	CA2	Carbonic anhydrase 2
	PGR	Progesterone receptor
	THRB	Thyroid hormone receptor beta
	AKR1C2	Aldo-keto reductase family 1 member C2
	PIM1	Serine/threonine-protein kinase pim-1
	STS	Steryl-sulfatase
	MAPKAPK2	MAP kinase-activated protein kinase 2
	APOA2	Apolipoprotein A-II
	GC	Vitamin D-binding protein
	ALB	Serum albumin
	CASP7	Caspase-7
	MAPK14	Mitogen-activated protein kinase 14
	NR3C2	Mineralocorticoid receptor
	SULT2A1	Bile salt sulfotransferase
	ESR1	Estrogen receptor
	HSD17B1	Estradiol 17-beta-dehydrogenase 1
	ITGAL	Integrin alpha-L
	NR1H4	Bile acid receptor
	F2	Prothrombin
	PTPN11	Tyrosine-protein phosphatase non-receptor type 11
	RORA	Nuclear receptor ROR-alpha
	TNNC1	Troponin C, slow skeletal and cardiac muscles
	PDPK1	3-phosphoinositide-dependent protein kinase 1
	SRC	Proto-oncogene tyrosine-protein kinase Src
	PPP5C	Serine/threonine-protein phosphatase 5
	AR	Androgen receptor
	EGFR	Epidermal growth factor receptor
