# Supplementary material for: A Network Pharmacology Approach to Uncover the Multiple Mechanisms of Hedyotis diffusa Willd. on Colorectal Cancer
Source: Evid Based Complement Alternat Med. 2018 Feb 12;2018:6517034. doi: 10.1155/2018/6517034 (PMC5829364; doi:10.1155/2018/6517034)
Supplement: Supplementary Materials — Table S1: the compounds information of HDW. Table S2: the compounds in HDW and their corresponding targets. Table S3: the targets of CRC. Table S4: the topological features of all nodes in the CRC targets' PPI network. Table S5: the topological features of all nodes in the compound-compound target-CRC target-other human proteins' PPI network. Table S6: the GO analysis for the major targets of HDW (FDR < 0.01). Table S7: the KEGG analysis for the major targets of HDW (FDR < 0.01). [file 6517034.f1.zip › Table S3.xlsx]

## Sheet: Sheet1
Table S3 CRC targets
Gene name	Protein name	Species
MLH1	DNA mismatch repair protein Mlh1	Homo sapiens
BRAF	Serine/threonine-protein kinase B-raf	Homo sapiens
MSH2	DNA mismatch repair protein Msh2	Homo sapiens
MSH6	DNA mismatch repair protein Msh6	Homo sapiens
PIK3CA	Phosphatidylinositol 4,5-bisphosphate 3-kinase catalytic subunit alpha isoform	Homo sapiens
APC	Adenomatous polyposis coli protein	Homo sapiens
CTNNB1	Catenin beta-1	Homo sapiens
MT-CO1	Cytochrome c oxidase subunit 1	Homo sapiens
PDGFRL	Platelet-derived growth factor receptor-like protein	Homo sapiens
KRAS	GTPase KRas	Homo sapiens
TP53	Cellular tumor antigen p53	Homo sapiens
EGFR	Epidermal growth factor receptor	Homo sapiens
TYMS	Thymidylate synthase	Homo sapiens
MUTYH	Adenine DNA glycosylase	Homo sapiens
