# Supplementary material for: A Network Pharmacology Approach to Uncover the Multiple Mechanisms of Hedyotis diffusa Willd. on Colorectal Cancer
Source: Evid Based Complement Alternat Med. 2018 Feb 12;2018:6517034. doi: 10.1155/2018/6517034 (PMC5829364; doi:10.1155/2018/6517034)
Supplement: Supplementary Materials — Table S1: the compounds information of HDW. Table S2: the compounds in HDW and their corresponding targets. Table S3: the targets of CRC. Table S4: the topological features of all nodes in the CRC targets' PPI network. Table S5: the topological features of all nodes in the compound-compound target-CRC target-other human proteins' PPI network. Table S6: the GO analysis for the major targets of HDW (FDR < 0.01). Table S7: the KEGG analysis for the major targets of HDW (FDR < 0.01). [file 6517034.f1.zip › Table S4.xlsx]

## Sheet: Sheet1
Table S4 Topological features of CRC targets’ PPI network
Gene	Degree	Node betweenness	Closeness
PCNA	37	0.18729	0.869565
MLH1	36	0.0859564	0.833333
MSH2	36	0.0884342	0.833333
MSH6	35	0.0511933	0.8
PMS2	31	0.0645403	0.769231
PMS1	28	0.0477734	0.714286
KRAS	27	0.151197	0.666667
PIK3CA	27	0.255012	0.688525
EXO1	26	0.00410401	0.689655
HRAS	26	0.204942	0.688525
APC	20	0.248821	1
CTNNB1	19	0.115488	0.9375
ERCC1	19	0.00650376	0.689655
AXIN1	18	0.0924717	0.882353
MAPK1	18	0.0192852	0.531646
MSH3	18	0.00410401	0.689655
BRAF	17	0.0567607	0.506024
MAP2K1	17	0.0150985	0.518519
POLE	17	0.00350877	0.666667
TP53	16	0.389481	0.608696
EGFR	15	0.0454206	0.583333
GSK3B	15	0.0338095	0.75
NRAS	15	0.0264547	0.518519
AXIN2	14	0.0153288	0.714286
TCF7	14	0.0153288	0.714286
EGF	10	0.0211023	0.56
MT-CO1	10	0.0624339	1
MT-CO2	10	0.0624339	1
MT-CO3	10	0.0624339	1
MUTYH	10	0.0617658	0.666667
RAD51	10	0.0206231	0.666667
TYMS	10	0.461111	1
MDM2	9	0.00549748	0.411765
MT-CYB	9	0.0444444	0.909091
RPA1	9	0	0.645161
SOS1	9	0.00436646	0.494118
BCL2	8	0.00336818	0.407767
COX4I1	8	0.0031746	0.833333
COX5B	8	0.0031746	0.833333
COX6A1	8	0.0031746	0.833333
CYCS	8	0.0031746	0.833333
GRB2	8	0.00024335	0.482759
IRS1	8	0.00286237	0.47191
MAP2K2	8	0	0.47191
MAPK3	8	0.00232997	0.482759
PIK3R1	8	0.00286237	0.47191
PTPN11	8	0.00024335	0.482759
RAF1	8	0.00232997	0.482759
RAP1A	8	0	0.47191
RAP1B	8	0	0.47191
SHC1	8	0.00024335	0.482759
AKT1	7	0.00135376	0.466667
BTRC	7	0.00539683	0.652174
CBL	7	0	0.47191
CDK2	7	0.00149051	0.403846
CDKN1A	7	0.00149051	0.403846
COX5A	7	0	0.769231
LEF1	7	0.00873016	0.652174
PDGFRL	7	0.904762	1
TCF7L2	7	0.00136054	0.652174
ARAF	6	0	0.428571
BAX	6	0.00139373	0.4
CDH1	6	0.0108843	0.625
DHFR	6	0.0444444	0.714286
IRS2	6	0.00023229	0.461538
PRKDC	6	0	0.588235
PTEN	6	0.00083111	0.461538
SIAH1	6	0.0015873	0.625
ATM	5	0.00077429	0.396226
CDH2	5	0.0015873	0.6
CDKN2A	5	0	0.396226
CREBBP	5	0.00023229	0.396226
CTNNA1	5	0.0015873	0.6
DHFRL1	5	0	0.666667
DTYMK	5	0.00555556	0.666667
DUT	5	0.00555556	0.666667
ERBB2	5	0.00029036	0.466667
FAM123B	5	0	0.6
FPGS	5	0	0.666667
JUP	5	0	0.6
MLH3	5	0.0004386	0.540541
MSH4	5	0.0004386	0.512821
MSH5	5	0.0004386	0.512821
MTHFD1	5	0	0.666667
MT-ND1	5	0	0.666667
MT-ND4	5	0	0.666667
OGG1	5	0.00446571	0.540541
PRKCA	5	0	0.456522
RPS6KB1	5	0	0.428571
RRM2	5	0.0333333	0.666667
SHMT1	5	0	0.666667
TK1	5	0.00555556	0.666667
APEX1	4	0	0.512821
APEX2	4	0	0.512821
DCTD	4	0	0.625
POLA1	4	0	0.526316
MDM4	3	0	0.388889
RRAS	3	0	0.446809
TGFA	3	0	0.415842
TP53BP2	3	0	0.388889
ACACA	2	0	0.583333
ACACB	2	0	0.583333
PHLPP1	2	0	0.583333
PHLPP2	2	0	0.583333
LRGUK	1	0	0.538462
LRRK2	1	0	0.538462
MRAS	1	0	0.411765
RIT1	1	0	0.33871
TUSC3	1	0	0.538462
ZRANB1	1	0	0.517241
