# Supplementary material for: A Network Pharmacology Approach to Uncover the Multiple Mechanisms of Hedyotis diffusa Willd. on Colorectal Cancer
Source: Evid Based Complement Alternat Med. 2018 Feb 12;2018:6517034. doi: 10.1155/2018/6517034 (PMC5829364; doi:10.1155/2018/6517034)
Supplement: Supplementary Materials — Table S1: the compounds information of HDW. Table S2: the compounds in HDW and their corresponding targets. Table S3: the targets of CRC. Table S4: the topological features of all nodes in the CRC targets' PPI network. Table S5: the topological features of all nodes in the compound-compound target-CRC target-other human proteins' PPI network. Table S6: the GO analysis for the major targets of HDW (FDR < 0.01). Table S7: the KEGG analysis for the major targets of HDW (FDR < 0.01). [file 6517034.f1.zip › Table S5.xlsx]

## Sheet: Sheet1
Table S5 Topological features of compound-compound target-CRC target-other human proteins’ PPI network
Name	Degree	Node betweenness	Closeness
HRAS	36	0.566136	0.51875
PIK3CA	24	0.0826678	0.412935
KRAS	21	0.0434875	0.408867
TP53	16	0.167225	0.397129
MAPK1	15	0.00815521	0.378995
APC	15	0.0445021	0.271242
MAP2K1	14	0.00986764	0.375566
NRAS	14	0.00669337	0.375566
BRAF	14	0.0296884	0.372197
CTNNB1	14	0.0204057	0.270358
EGFR	13	0.0182038	0.391509
GSK3B	13	0.301384	0.341564
AXIN1	13	0.0196955	0.269481
CDK2	11	0.0523901	0.338776
AKT1	10	0.0324982	0.406863
RAF1	10	0.0405768	0.386047
EGF	10	0.00898542	0.386047
TYMS	10	0.0147664	0.244118
PIK3R1	9	0.00706184	0.375566
SOS1	9	0.00153804	0.342975
MDM2	9	0.00325203	0.315589
TCF7	9	0.00732407	0.266026
AXIN2	9	0.00732407	0.266026
GRB2	8	6.157e-05	0.365639
PTPN11	8	6.157e-05	0.365639
SHC1	8	6.157e-05	0.365639
IRS1	8	0.00146866	0.362445
RAP1B	8	0	0.362445
RAP1A	8	0	0.362445
MAP2K2	8	0	0.362445
MAPK3	8	0.00058625	0.340164
BCL2	8	0.00296797	0.314394
CBL	7	0	0.362445
CDKN1A	7	0.00116074	0.313208
DTYMK	7	0.0761409	0.301818
TCF7L2	7	0.0028966	0.264331
BTRC	7	0.00016652	0.264331
LEF1	7	0.00026937	0.217277
PTEN	6	0.00095472	0.359307
IRS2	6	5.877e-05	0.359307
ARAF	6	0	0.32549
DUT	6	0.0322695	0.296429
SHMT1	6	0.0836217	0.29021
BAX	6	0.00035263	0.29021
CDH1	6	0.0131816	0.263492
SIAH1	6	4.898e-05	0.263492
TK1	6	0.0241698	0.24058
DHFR	6	0.00073465	0.234463
quercetin-3-O-sambubioside	5	0.0909496	0.375566
PRKCA	5	0	0.357759
RPS6KB1	5	0	0.328063
ATM	5	0.00127339	0.310861
CREBBP	5	0.00084239	0.310861
CDKN2A	5	0	0.310861
ERBB2	5	7.346e-05	0.306273
FAM123B	5	0	0.262658
RRM2	5	0.00149763	0.239884
FPGS	5	0	0.233803
DHFRL1	5	0	0.233803
MTHFD1	5	0	0.233803
CDH2	5	4.898e-05	0.216146
CTNNA1	5	4.898e-05	0.216146
JUP	5	0	0.216146
ferulic acid	4	0.0525028	0.380734
DCTD	4	0	0.239193
quercetin	3	0.115357	0.410891
p-coumaric acid	3	0.0993359	0.404878
quercetin-3-sophoroside	3	0.0937081	0.399038
RRAS	3	0	0.354701
TGFA	3	0	0.294326
TP53BP2	3	0	0.287197
MDM4	3	0	0.287197
coumarin	2	0.101217	0.367257
rutin	2	0.00211648	0.354701
scandoside methyl ester	2	0.00211648	0.354701
scandoside	2	0.00211648	0.354701
E-6-O-p-feruloyl scandoside methyl ester	1	0	0.342975
stigmasterol-β-D-glucoside	1	0	0.342975
quercetin-3-O-(2''-O-β-D-glucopyranosyl)-β-D-galactopyranoside	1	0	0.342975
deacetylasperulosidic acid	1	0	0.342975
MRAS	1	0	0.293286
RIT1	1	0	0.272131
ZRANB1	1	0	0.213918
succinic acid	1	0	0.194379
