# Supplementary material for: A Network Pharmacology Approach to Uncover the Multiple Mechanisms of Hedyotis diffusa Willd. on Colorectal Cancer
Source: Evid Based Complement Alternat Med. 2018 Feb 12;2018:6517034. doi: 10.1155/2018/6517034 (PMC5829364; doi:10.1155/2018/6517034)
Supplement: Supplementary Materials — Table S1: the compounds information of HDW. Table S2: the compounds in HDW and their corresponding targets. Table S3: the targets of CRC. Table S4: the topological features of all nodes in the CRC targets' PPI network. Table S5: the topological features of all nodes in the compound-compound target-CRC target-other human proteins' PPI network. Table S6: the GO analysis for the major targets of HDW (FDR < 0.01). Table S7: the KEGG analysis for the major targets of HDW (FDR < 0.01). [file 6517034.f1.zip › Table S6.xlsx]

## Sheet: Sheet1
Table S6 Gene Ontology (GO) analysis of therapy target genes (FDR <0.01)
Category	GO ID	Term	Count	%	PValue	Genes	Fold Enrichment	Bonferroni	Benjamini	FDR
biological process	GO:0033138	positive regulation of peptidyl-serine phosphorylation	5	50	3.43406e-08	AKT1, BRAF, GSK3B, RAF1, PIK3CA	119.943	1.27746e-05	1.27746e-05	4.73924e-05
molecular function	GO:0016301	kinase activity	6	60	6.8428e-08	AKT1, BRAF, GSK3B, RAF1, PIK3CA, CDK2	42.0274	5.06366e-06	5.06366e-06	7.16215e-05
cellular component	GO:0005829	cytosol	10	100	2.16121e-07	AKT1, HRAS, KRAS, BRAF, GSK3B, TP53, RAF1, PIK3CA, CDK2, APC	5.49744	1.46961e-05	1.46961e-05	0.000222339
molecular function	GO:0004674	protein serine/threonine kinase activity	6	60	6.25004e-07	AKT1, BRAF, GSK3B, RAF1, PIK3CA, CDK2	26.9378	4.62493e-05	2.31249e-05	0.000654171
biological process	GO:0038128	ERBB2 signaling pathway	4	40	8.89735e-07	AKT1, HRAS, KRAS, PIK3CA	176.758	0.000330927	0.000165477	0.00122789
molecular function	GO:0005524	ATP binding	8	80	1.2934e-06	AKT1, KRAS, BRAF, GSK3B, TP53, RAF1, PIK3CA, CDK2	9.03331	9.57073e-05	3.19034e-05	0.00135376
biological process	GO:0007265	Ras protein signal transduction	4	40	5.72398e-06	HRAS, KRAS, TP53, CDK2	95.9543	0.00212706	0.000709523	0.00789919
