# Supplementary material for: A Network Pharmacology Approach to Uncover the Multiple Mechanisms of Hedyotis diffusa Willd. on Colorectal Cancer
Source: Evid Based Complement Alternat Med. 2018 Feb 12;2018:6517034. doi: 10.1155/2018/6517034 (PMC5829364; doi:10.1155/2018/6517034)
Supplement: Supplementary Materials — Table S1: the compounds information of HDW. Table S2: the compounds in HDW and their corresponding targets. Table S3: the targets of CRC. Table S4: the topological features of all nodes in the CRC targets' PPI network. Table S5: the topological features of all nodes in the compound-compound target-CRC target-other human proteins' PPI network. Table S6: the GO analysis for the major targets of HDW (FDR < 0.01). Table S7: the KEGG analysis for the major targets of HDW (FDR < 0.01). [file 6517034.f1.zip › Table S7.xlsx]

## Sheet: Sheet1
Table S7 KEGG analysis of therapy target genes (FDR <0.01)
Category	KEGG ID	Term	Class	Count	%	PValue	Genes	Fold Enrichment	Bonferroni	Benjamini	FDR
KEGG pathway	hsa05213	Endometrial cancer	Human Diseases; Cancers	9	90	5.24143e-17	AKT1, HRAS, KRAS, BRAF, GSK3B, TP53, RAF1, PIK3CA, APC	119.596	5.45109e-15	5.45109e-15	5.86059e-14
KEGG pathway	hsa05215	Prostate cancer	Human Diseases; Cancers	9	90	4.45339e-15	AKT1, HRAS, KRAS, BRAF, GSK3B, TP53, RAF1, PIK3CA, CDK2	70.6705	4.61853e-13	2.30926e-13	4.9627e-12
KEGG pathway	hsa05210	Colorectal cancer	Human Diseases; Cancers	8	80	1.17318e-13	AKT1, KRAS, BRAF, GSK3B, TP53, RAF1, PIK3CA, APC	89.1613	1.22045e-11	4.06819e-12	1.31217e-10
KEGG pathway	hsa05200	Pathways in cancer	Human Diseases; Cancers	10	100	5.70718e-12	AKT1, HRAS, KRAS, BRAF, GSK3B, TP53, RAF1, PIK3CA, CDK2, APC	17.5827	5.9355e-10	1.48388e-10	6.38138e-09
KEGG pathway	hsa04722	Neurotrophin signaling pathway	Organismal Systems; Nervous system	8	80	1.39831e-11	AKT1, HRAS, KRAS, BRAF, GSK3B, TP53, RAF1, PIK3CA	46.0667	1.45424e-09	2.90847e-10	1.56348e-08
KEGG pathway	hsa05223	Non-small cell lung cancer	Human Diseases; Cancers	7	70	1.77433e-11	AKT1, HRAS, KRAS, BRAF, TP53, RAF1, PIK3CA	86.375	1.84531e-09	3.07552e-10	1.98393e-08
KEGG pathway	hsa05160	Hepatitis C	Human Diseases; Infectious diseases	8	80	2.91431e-11	AKT1, HRAS, KRAS, BRAF, GSK3B, TP53, RAF1, PIK3CA	41.5639	3.03089e-09	4.32984e-10	3.25857e-08
KEGG pathway	hsa05214	Glioma	Human Diseases; Cancers	7	70	4.49865e-11	AKT1, HRAS, KRAS, BRAF, TP53, RAF1, PIK3CA	74.4154	4.67859e-09	5.84824e-10	5.03006e-08
KEGG pathway	hsa05218	Melanoma	Human Diseases; Cancers	7	70	7.78271e-11	AKT1, HRAS, KRAS, BRAF, TP53, RAF1, PIK3CA	68.1268	8.09402e-09	8.99335e-10	8.70206e-08
KEGG pathway	hsa05220	Chronic myeloid leukemia	Human Diseases; Cancers	7	70	8.48705e-11	AKT1, HRAS, KRAS, BRAF, TP53, RAF1, PIK3CA	67.1806	8.82653e-09	8.82653e-10	9.48959e-08
KEGG pathway	hsa04012	ErbB signaling pathway	Environmental Information Processing; Signal transduction	7	70	2.72769e-10	AKT1, HRAS, KRAS, BRAF, GSK3B, RAF1, PIK3CA	55.5977	2.83679e-08	2.5789e-09	3.0499e-07
KEGG pathway	hsa04919	Thyroid hormone signaling pathway	Organismal Systems; Endocrine system	7	70	1.42598e-09	AKT1, HRAS, KRAS, GSK3B, TP53, RAF1, PIK3CA	42.4298	1.48302e-07	1.23585e-08	1.59442e-06
KEGG pathway	hsa05221	Acute myeloid leukemia	Human Diseases; Cancers	6	60	3.58186e-09	AKT1, HRAS, KRAS, BRAF, RAF1, PIK3CA	74.0357	3.72513e-07	2.86549e-08	4.00497e-06
KEGG pathway	hsa04068	FoxO signaling pathway	Environmental Information Processing; Signal transduction	7	70	3.8091e-09	AKT1, HRAS, KRAS, BRAF, RAF1, PIK3CA, CDK2	36.097	3.96146e-07	2.82962e-08	4.25906e-06
KEGG pathway	hsa04910	Insulin signaling pathway	Organismal Systems; Endocrine system	7	70	4.55259e-09	AKT1, HRAS, KRAS, BRAF, GSK3B, RAF1, PIK3CA	35.0507	4.7347e-07	3.15647e-08	5.09038e-06
KEGG pathway	hsa04550	Signaling pathways regulating pluripotency of stem cells	Cellular Processes; Cellular community - eukaryotes	7	70	4.96726e-09	AKT1, HRAS, KRAS, GSK3B, RAF1, PIK3CA, APC	34.55	5.16595e-07	3.22872e-08	5.55402e-06
KEGG pathway	hsa05161	Hepatitis B	Human Diseases; Infectious diseases	7	70	6.14301e-09	AKT1, HRAS, KRAS, TP53, RAF1, PIK3CA, CDK2	33.3586	6.38873e-07	3.75808e-08	6.86867e-06
KEGG pathway	hsa05230	Central carbon metabolism in cancer	Human Diseases; Cancers	6	60	7.1218e-09	AKT1, HRAS, KRAS, TP53, RAF1, PIK3CA	64.7812	7.40667e-07	4.11482e-08	7.96308e-06
KEGG pathway	hsa05211	Renal cell carcinoma	Human Diseases; Cancers	6	60	7.71154e-09	AKT1, HRAS, KRAS, BRAF, RAF1, PIK3CA	63.7846	8.02e-07	4.22105e-08	8.62248e-06
KEGG pathway	hsa05212	Pancreatic cancer	Human Diseases; Cancers	6	60	7.71154e-09	AKT1, KRAS, BRAF, TP53, RAF1, PIK3CA	63.7846	8.02e-07	4.22105e-08	8.62248e-06
KEGG pathway	hsa04662	B cell receptor signaling pathway	Organismal Systems; Immune system	6	60	1.0472e-08	AKT1, HRAS, KRAS, GSK3B, RAF1, PIK3CA	60.087	1.08909e-06	5.44546e-08	1.17091e-05
KEGG pathway	hsa04917	Prolactin signaling pathway	Organismal Systems; Endocrine system	6	60	1.21201e-08	AKT1, HRAS, KRAS, GSK3B, RAF1, PIK3CA	58.3944	1.26049e-06	6.00236e-08	1.35519e-05
KEGG pathway	hsa04151	PI3K-Akt signaling pathway	Environmental Information Processing; Signal transduction	8	80	2.40649e-08	AKT1, HRAS, KRAS, GSK3B, TP53, RAF1, PIK3CA, CDK2	16.0232	2.50275e-06	1.13761e-07	2.69076e-05
KEGG pathway	hsa04062	Chemokine signaling pathway	Organismal Systems; Immune system	7	70	2.75817e-08	AKT1, HRAS, KRAS, BRAF, GSK3B, RAF1, PIK3CA	26.0054	2.8685e-06	1.24717e-07	3.08399e-05
KEGG pathway	hsa04914	Progesterone-mediated oocyte maturation	Organismal Systems; Endocrine system	6	60	3.41295e-08	AKT1, KRAS, BRAF, RAF1, PIK3CA, CDK2	47.6552	3.54946e-06	1.47895e-07	3.81611e-05
KEGG pathway	hsa05205	Proteoglycans in cancer	Human Diseases; Cancers	7	70	4.26488e-08	AKT1, HRAS, KRAS, BRAF, TP53, RAF1, PIK3CA	24.185	4.43547e-06	1.77419e-07	4.76868e-05
KEGG pathway	hsa04660	T cell receptor signaling pathway	Organismal Systems; Immune system	6	60	8.02308e-08	AKT1, HRAS, KRAS, GSK3B, RAF1, PIK3CA	40.2524	8.34397e-06	3.20923e-07	8.97082e-05
KEGG pathway	hsa05219	Bladder cancer	Human Diseases; Cancers	5	50	1.31584e-07	HRAS, KRAS, BRAF, TP53, RAF1	84.2683	1.36846e-05	5.0684e-07	0.000147127
KEGG pathway	hsa04071	Sphingolipid signaling pathway	Environmental Information Processing; Signal transduction	6	60	1.73219e-07	AKT1, HRAS, KRAS, TP53, RAF1, PIK3CA	34.55	1.80146e-05	6.43383e-07	0.00019368
KEGG pathway	hsa05166	HTLV-I infection	Human Diseases; Infectious diseases	7	70	1.86683e-07	AKT1, HRAS, KRAS, GSK3B, TP53, PIK3CA, APC	18.8945	1.94149e-05	6.69485e-07	0.000208736
KEGG pathway	hsa04370	VEGF signaling pathway	Environmental Information Processing; Signal transduction	5	50	6.70217e-07	AKT1, HRAS, KRAS, RAF1, PIK3CA	56.6393	6.97002e-05	2.32342e-06	0.000749385
KEGG pathway	hsa04664	Fc epsilon RI signaling pathway	Organismal Systems; Immune system	5	50	1.04165e-06	AKT1, HRAS, KRAS, RAF1, PIK3CA	50.8088	0.000108326	3.49458e-06	0.0011647
KEGG pathway	hsa04510	Focal adhesion	Cellular Processes; Cellular community - eukaryotes	6	60	2.56499e-06	AKT1, HRAS, BRAF, GSK3B, RAF1, PIK3CA	20.1262	0.000266724	8.3362e-06	0.00286795
KEGG pathway	hsa04015	Rap1 signaling pathway	Cellular Processes; Cellular community - eukaryotes	6	60	2.82095e-06	AKT1, HRAS, KRAS, BRAF, RAF1, PIK3CA	19.7429	0.000293337	8.89025e-06	0.00315414
KEGG pathway	hsa04810	Regulation of actin cytoskeleton	Cellular Processes; Cell motility	6	60	2.888e-06	HRAS, KRAS, BRAF, RAF1, PIK3CA, APC	19.6493	0.000300307	8.83385e-06	0.0032291
KEGG pathway	hsa04915	Estrogen signaling pathway	Organismal Systems; Endocrine system	5	50	4.72854e-06	AKT1, HRAS, KRAS, RAF1, PIK3CA	34.899	0.000491648	1.40505e-05	0.00528698
KEGG pathway	hsa05231	Choline metabolism in cancer	Human Diseases; Cancers	5	50	5.12268e-06	AKT1, HRAS, KRAS, RAF1, PIK3CA	34.2079	0.000532619	1.47988e-05	0.00572766
KEGG pathway	hsa05216	Thyroid cancer	Human Diseases; Cancers	4	40	5.4902e-06	HRAS, KRAS, BRAF, TP53	95.3103	0.000570819	1.54318e-05	0.00613856
KEGG pathway	hsa04010	MAPK signaling pathway	Environmental Information Processing; Signal transduction	6	60	7.34548e-06	AKT1, HRAS, KRAS, BRAF, TP53, RAF1	16.2588	0.000763641	2.01033e-05	0.00821287
